# Supplementary material
Source: Springer Nature journal article supplement (https://www.springermedizin.de/resource/supplementary/12879_2008_832_MOESM2_ESM.pdf/9449886)

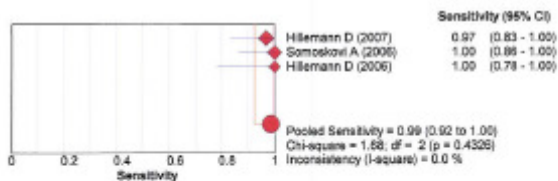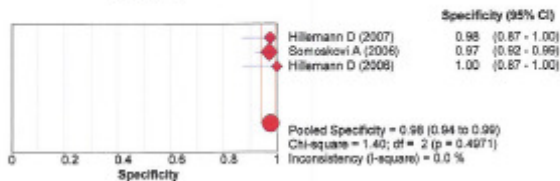

## 2a) Genotype<sup>®</sup> MTBDR

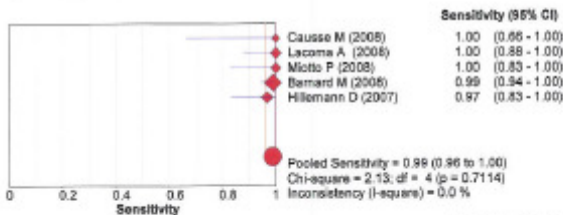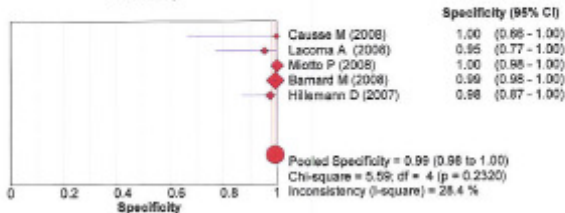

## 2b) Genotype<sup>®</sup> MTBDR<sub>p/Is</sub>

Supplement: MOESM2 [file 9449886]
